# Supplementary material for: Pimozide and Imipramine Blue Exploit Mitochondrial Vulnerabilities and Reactive Oxygen Species to Cooperatively Target High Risk Acute Myeloid Leukemia
Source: MDPI journal article supplement (doi:10.3390/antiox10060956), 2021-06-15
Supplement: s1 [file s1]

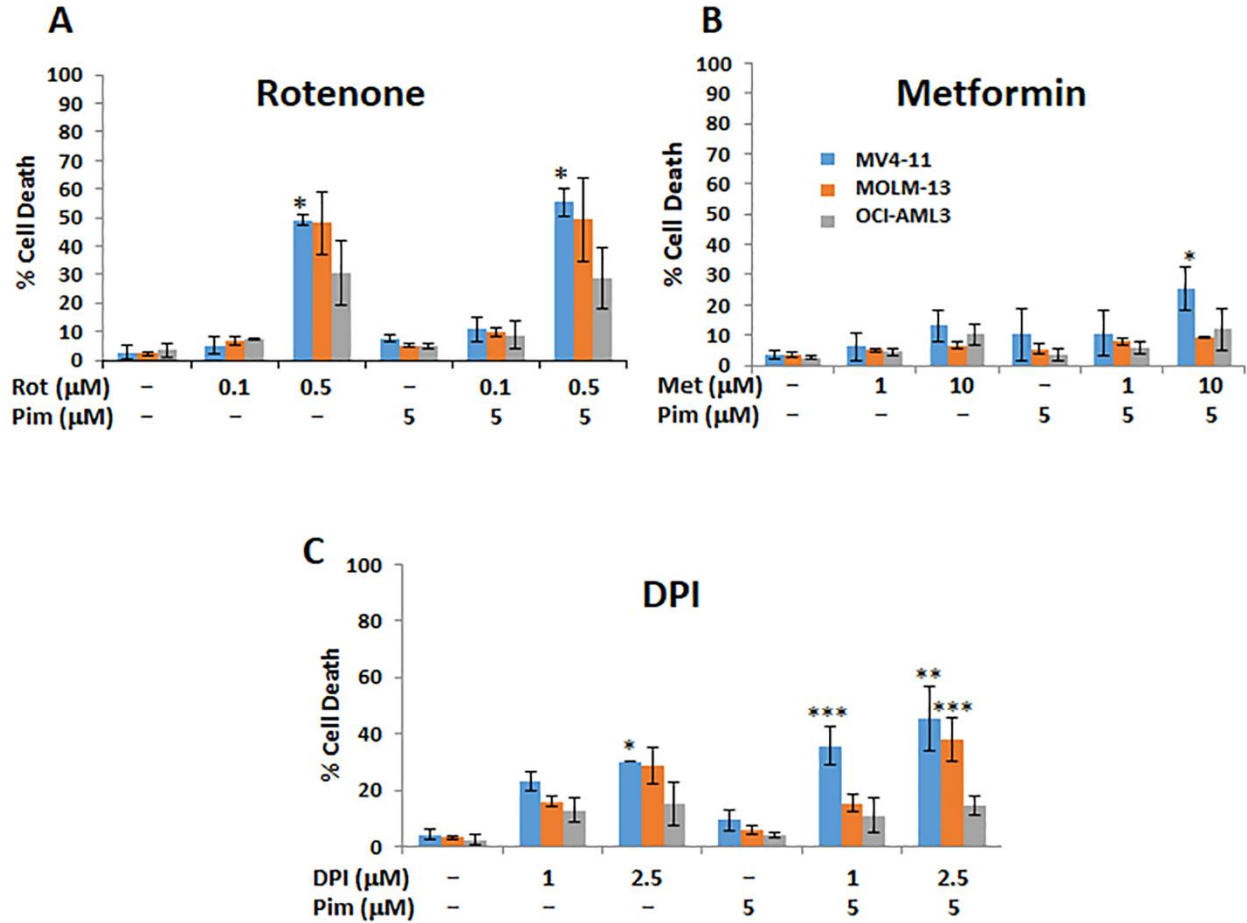

**Figure S1. Comparison of pimozide combinations with the ROS modulators, rotenone, metformin, and DPI.** Cells were treated for 48 hours with rotenone (Rot), metformin (Met), or diphenyleneiodonium (DPI) and the percentage of cell death was determined by trypan blue exclusion assay. N=3 for all three drugs tested on MV4-11, MOLM-13, and OCI-AML3 cells. P values were calculated relative to OCI-AML3 at the highest concentration of Rot (Panel A), Met (Panel B), or DPI (Panel C). \*P<0.05; \*\*P<0.01; \*\*\*P<0.001.

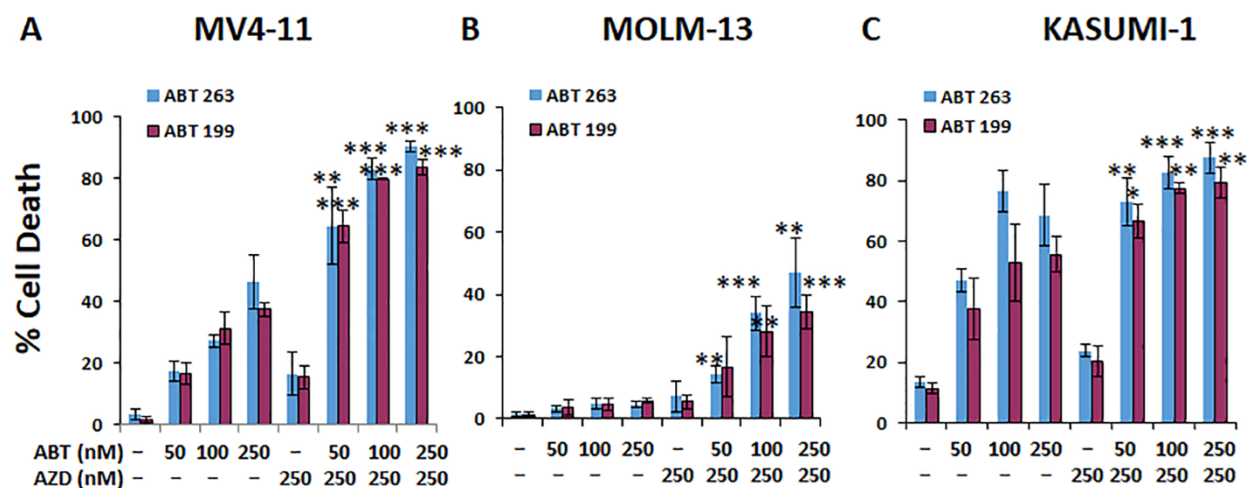

**Figure S2. ABT-263 and ABT-199 have equivalent synergistic cytotoxicity with mTOR inhibition in AML cells.** Three cell lines were examined for sensitivity to treatment with ABT-263 and AZD 8055 for 48 hours at the indicated drug concentrations. These cell lines included: MV4-11 (**panel A**, high responder; homozygous Flt3-ITD; N=3) and MOLM-13 cells (**panel B**, intermediate responder; heterozygous Flt3-ITD; N=4) and Kasumi control cells (**panel C**, non-responder; Flt3 wild-type; N=3). P values were calculated relative to ABT 50 (nM) group. \*P<0.05; \*\*P<0.01; \*\*\*P<0.001.
